# Supplementary material
Source: publisher site journal article supplement (https://static.cambridge.org/content/id/urn:cambridge.org:id:article:S003382221900064X/resource/name/S003382221900064Xsupp001.docx)
Supplement: Supplementary file 1 [file S003382221900064Xsupp001.docx]

Supplementary information

SEM images of lead white before and after heating at 400 (MM1), 500 (MM2) and 600 °C (MM3).

Lead white is formed of sub-micrometric grains. From 400°C to 600 °C, the lead white grain size is increasing as a function of the heating temperature.

In the picture of MM2 and MM3, pores due the CO2 release are visible

EDX analysis shows lower amounts of C and O in MM1, MM2 and MM3 than in the pristine lead white powder, confirming the CO2 release.


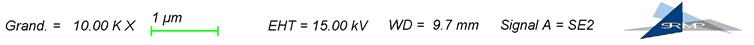

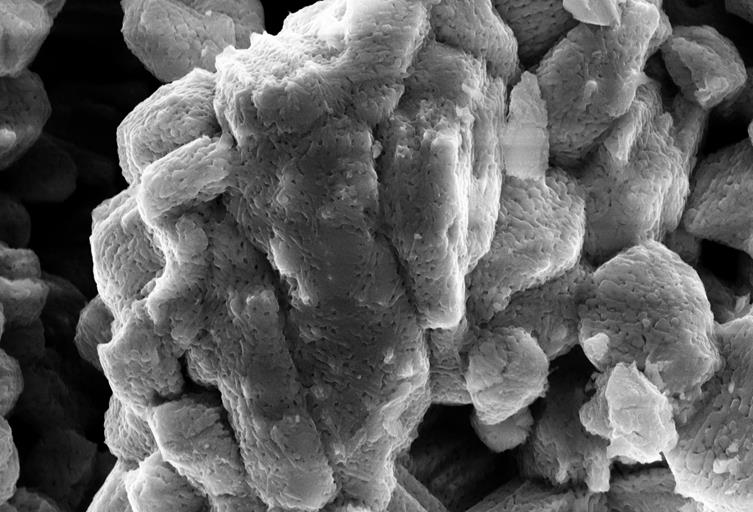

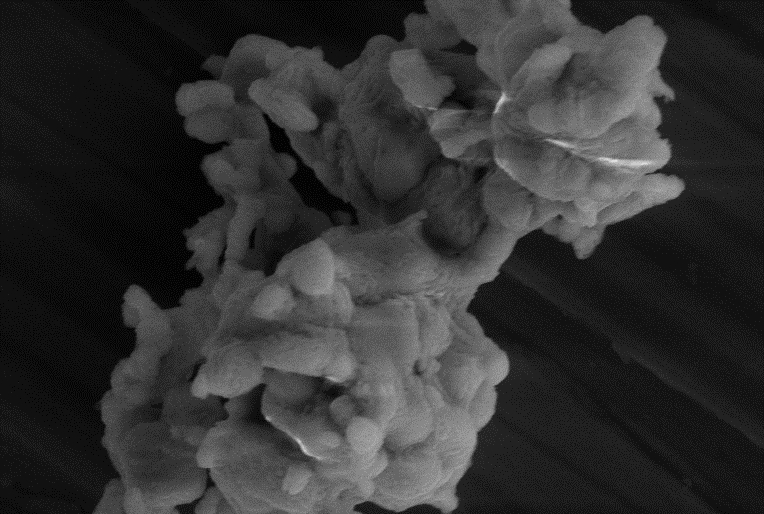

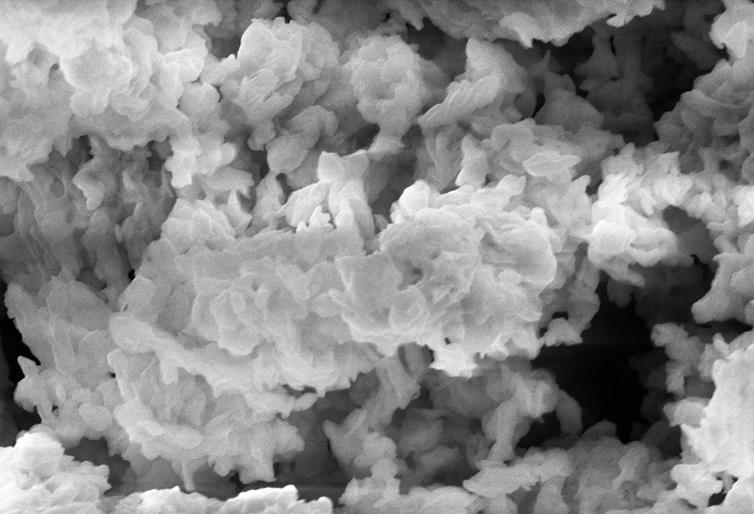

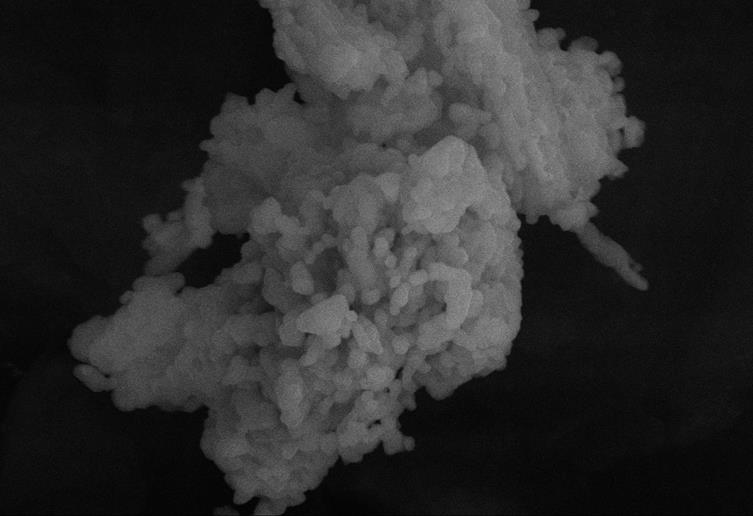


MM3

MM2

MM1

Lead white powder

400°C

600°C
